# Supplementary material
Source: PubMed Central journal article supplement (PMC2955094)
Supplement: 1007448107_pnas.1007448107_SI.pdf [file 1007448107_pnas.1007448107_SI.pdf]

# Supporting Information

Nakamura et al. 10.1073/pnas.1007448107

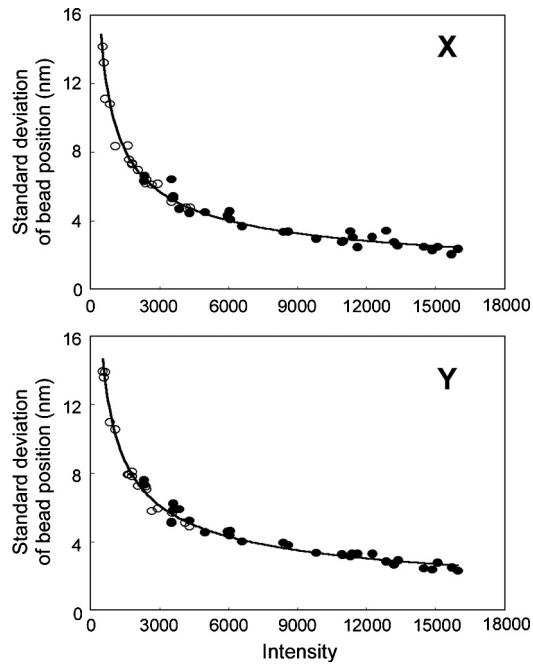

**Fig. S1.** Standard deviations of the X and Y positions as a function of fluorescence intensity of 100 nm-fluorescent beads that are firmly attached onto a cover slip. The positions of the beads were determined from images recorded by the EMCCD camera at 0.4 msec intervals. Open and closed circles are the data obtained by an ultra-high-pressure mercury lamp and a dye laser, respectively. Note that the theoretical curves in solid lines are well fitted to the data points.





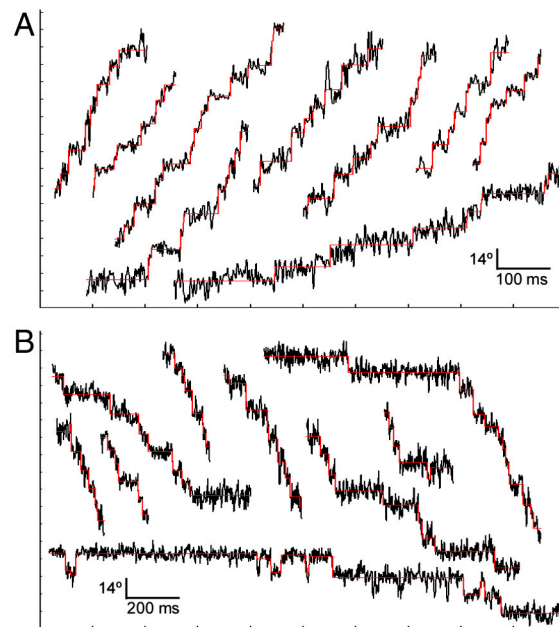

**Fig. 55.** Examples of stepping rotations detected in the motors of two different cells. (A) MM3076iC, and (B) SJW46. In both cases cells were grown with 25  $\mu$ M IPTG for 4 h, and 100 nm-fluorescent beads were attached to the flagellar filaments. The bead images were recorded by the EMCCD camera at 0.4 msec intervals, with epifluorescence excitations using a dye laser ( $\approx$ 20 mW). All the measurements were carried out at an external pH 6.0 in the presence of 20 mM potassium benzoate at 23  $^{\circ}$ C. Red lines are steps determined by a step-finding algorithm.
